# Supplementary material for: Bioactive Compounds of Pseudoalteromonas sp. IBRL PD4.8 Inhibit Growth of Fouling Bacteria and Attenuate Biofilms of Vibrio alginolyticus FB3
Source: PubMed Central journal article supplement — Pol J Microbiol. 2019 Mar 27;68(1):21–33. doi: 10.21307/pjm-2019-003 (PMC7256726; doi:10.21307/pjm-2019-003), 2019-03-27
Supplement: pjm-68-1-021_Supplementary.pdf [file pjm-68-1-021_Supplementary.pdf]

**Supplementary material: The LC-MS qualitative compound report of sub-fraction F3a**

for the article:

Supardy N.A. et al. Bioactive Compounds of *Pseudoalteromonas* sp. IBRL PD4.8 Inhibit Growth of Fouling Bacteria and Attenuate Biofilms of *Vibrio alginolyticus* FB3. Pol J Microbiol. 2019;68(1):21–33.

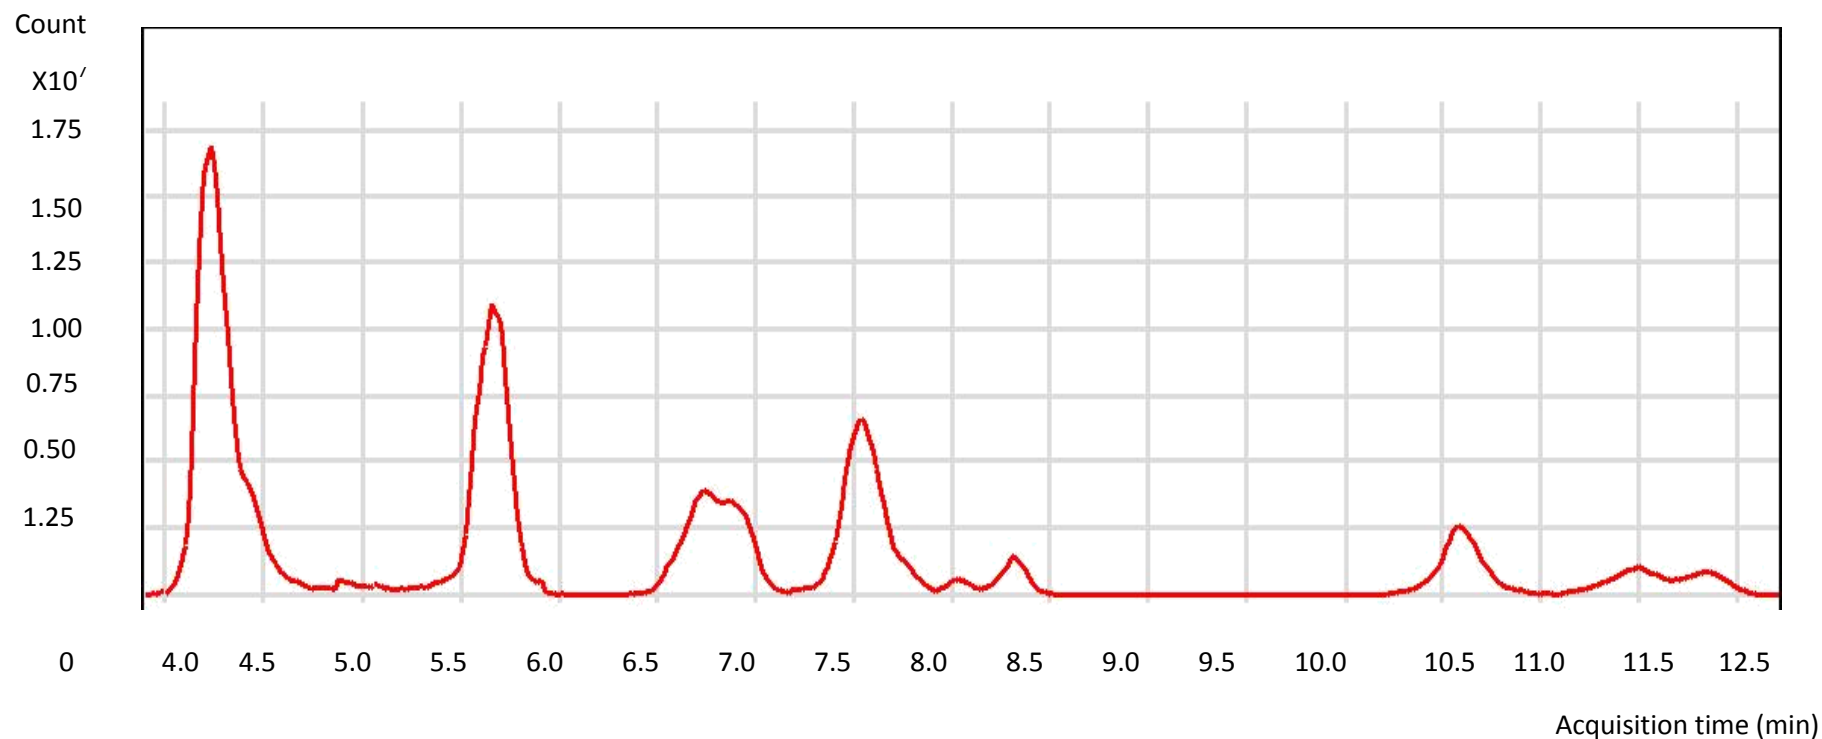

Fig. 1 S. The count versus acquisition time of LC-MS total ion chromatogram (TIC) of sub-fraction F3a.

Table I S

The compounds of the sub-fraction F3a.

| Compound label | RT     | Mass      | Name                              | DB Formula                                       | DB Diff (ppm) |
|----------------|--------|-----------|-----------------------------------|--------------------------------------------------|---------------|
| Cpd 1          | 4.093  | 216.0624  | -                                 |                                                  |               |
| Cpd 2          | 4.233  | 97.967    | Sulfate                           | H <sub>2</sub> O <sub>4</sub> S                  | 3.99          |
| Cpd 3          | 4.233  | 233.8893  | -                                 | -                                                |               |
| Cpd 4          | 4.233  | 80.9645   | -                                 | -                                                |               |
| Cpd 5          | 4.417  | 223.9666  | -                                 | -                                                |               |
| Cpd 6          | 4.906  | 248.1763  | 4,7,10,13-hexadecatetraenoic acid | C <sub>16</sub> H <sub>24</sub> O <sub>2</sub>   | 5.3           |
| Cpd 7          | 5.419  | 225.1718  | -                                 | -                                                |               |
| Cpd 8          | 5.662  | 196.0729  | Homoveratric acid                 | C <sub>10</sub> H <sub>12</sub> O <sub>4</sub>   | 3.17          |
| Cpd 9          | 5.663  | 522.1169  | -                                 | -                                                |               |
| Cpd 10         | 5.663  | 1034.9954 | -                                 | -                                                |               |
| Cpd 11         | 5.666  | 210.0087  | -                                 | -                                                |               |
| Cpd 12         | 6.724  | 292.2057  | -                                 | -                                                |               |
| Cpd 13         | 6.764  | 162.0419  | -                                 | -                                                |               |
| Cpd 14         | 6.809  | 326.1891  | Isoacitretin                      | C <sub>21</sub> H <sub>26</sub> O <sub>3</sub>   | -2.7          |
| Cpd 15         | 6.923  | 294.1859  | Sodium tetradecyl sulfate         | C <sub>14</sub> H <sub>30</sub> O <sub>4</sub> S | 2.07          |
| Cpd 16         | 7.512  | 256.2379  | -                                 | -                                                |               |
| Cpd 17         | 7.562  | 368.2222  | -                                 | -                                                |               |
| Cpd 18         | 7.617  | 340.2048  | D1-2-Hydroxymethylethisterone     | C <sub>22</sub> H <sub>28</sub> O <sub>3</sub>   | -2.94         |
| Cpd 19         | 8.037  | 340.206   | -                                 | -                                                |               |
| Cpd 20         | 8.321  | 482.3389  | -                                 | -                                                |               |
| Cpd 21         | 10.593 | 284.269   | -                                 | -                                                |               |
| Cpd 22         | 11.478 | 320.0682  | -                                 | -                                                |               |
| Cpd 23         | 11.838 | 320.0681  | -                                 | -                                                |               |
